# Supplementary material for: Borane-catalysed cyclodepolymerization of CO 2 -derived polycarbonates
Source: Royal Society of Chemistry journal article supplement (doi:10.1039/d5fd00050e), 2025-05-22
Supplement: d5fd00050e1.pdf [file d5fd00050e1.pdf]

## Supplementary Information

### ***Borane-catalysed cyclodepolymerization of CO<sub>2</sub>-derived polycarbonates***

*Mikhailey D. Wheeler and Francesca M. Kerton\**

Department of Chemistry, Memorial University, St. John's, NL, Canada AM2 3X7

\*e-mail: [fkerton@mun.ca](mailto:fkerton@mun.ca)

## Table of Contents

|                                                                                                                                                                                                                                                                                    |    |
|------------------------------------------------------------------------------------------------------------------------------------------------------------------------------------------------------------------------------------------------------------------------------------|----|
| 1. Liquid-assisted grinding PPC depolymerization procedure                                                                                                                                                                                                                         | 3  |
| <b>Table S1.</b> Depolymerization of terpolymers and polymer mixtures containing varying ratios of PCHC and PPC. <sup>a</sup>                                                                                                                                                      | 3  |
| <b>Figure S1.</b> <sup>1</sup> H NMR spectrum (300 MHz, CDCl <sub>3</sub> ) of poly(propylene carbonate) (PPC).                                                                                                                                                                    | 4  |
| <b>Figure S2.</b> <sup>1</sup> H NMR spectrum (300 MHz, CDCl <sub>3</sub> ) of poly(cyclohexene carbonate) (PCHC).                                                                                                                                                                 | 4  |
| <b>Figure S3.</b> Stacked <sup>1</sup> H NMR spectra (300 MHz, CDCl <sub>3</sub> ) of PCHC depolymerization progression (10 mol% BCF at 105 °C for 2 h). 15 min (top, purple), 30 min (second, blue), 60 min (third, green), 90 min (fourth, green/yellow), 120 min (bottom, red). | 5  |
| <b>Figure S4.</b> Overlay of normalized two-dimensional <i>in situ</i> FTIR spectra from CDP kinetic studies of PPC                                                                                                                                                                | 6  |
| <b>Figure S5.</b> Overlay of normalized two-dimensional <i>in situ</i> FTIR spectra from CDP kinetic studies of PCHC                                                                                                                                                               | 6  |
| <b>Figure S6.</b> <sup>1</sup> H NMR spectrum (300 MHz, CDCl <sub>3</sub> ) of PPC depolymerization with propylene carbonate impurity present. (1:1 PPC:PC, 2 h, 105 °C, 5 mol% BCF). % Conversion to PC = 78%                                                                     | 7  |
| <b>Figure S7.</b> <sup>1</sup> H NMR spectrum (300 MHz, CDCl <sub>3</sub> ) of PPC after BCF was exposed to air (2 h, 105 °C, 5 mol% BCF). % Conversion of PPC to PC = 11%                                                                                                         | 7  |
| <b>Figure S8.</b> <sup>1</sup> H NMR spectrum (300 MHz, CDCl <sub>3</sub> ) of PCHC depolymerization with 1 mol% H <sub>2</sub> O impurity present. (2 h, 105 °C, 5 mol% BCF). % Conversion of PCHC to CHC = <1%                                                                   | 8  |
| <b>Figure S9.</b> <sup>1</sup> H NMR spectrum (300 MHz, CDCl <sub>3</sub> ) of PPC depolymerization with CO <sub>2</sub> impurity present. (2 h, 105 °C, 5 mol% BCF, 40 bar CO <sub>2</sub> ). % Conversion of PPC to PC = 15%                                                     | 8  |
| <b>Figure S10.</b> Stacked <sup>1</sup> H NMR spectra (300 MHz, CDCl <sub>3</sub> ) of starting commercial polycarbonate diol Desmorphen C1200 (top, blue) and after 18 h depolymerization with BCF (5 mol%, 105 °C) in toluene.                                                   | 9  |
| <b>Figure S11.</b> <sup>1</sup> H NMR spectrum (500 MHz, CDCl <sub>3</sub> ) of PCHC and PPC mixture (4:1 PCHC: PPC, 5 mol% BCF, 105 °C) after 15 min. Line fitting was used to calculate % conversions. % conversion of PCHC to CHC = 22% (Table 3, entry 3)                      | 9  |
| <b>Figure S12.</b> <sup>1</sup> H NMR spectrum (500 MHz, CDCl <sub>3</sub> ) of terpolymer depolymerization (4:1 PCHC:PPC, 105 °C, 5 mol% BCF) after 30 min. Line fitting was used to calculate % conversions (Table 3, entry 1)                                                   | 10 |
| <b>Figure S13.</b> <sup>1</sup> H NMR spectrum (500 MHz, CDCl <sub>3</sub> ) of poly(bisphenol A carbonate) (PBPAC)                                                                                                                                                                | 10 |
| <b>Figure S14.</b> <sup>1</sup> H NMR spectrum (500 MHz, CDCl <sub>3</sub> ) of PBPAC and PPC mixture after 2 h depolymerization (5 mol% BCF to PPC, 105 °C)                                                                                                                       | 11 |

### 1. Liquid-assisted grinding PPC depolymerization procedure

Stainless steel mixer mill vessel equipped with 5 stainless steel balls were brought into the glovebox. ~100 mg PPC was added to vessel with ~1.5 mL of BCF solution (~16 mg/mL in toluene). Vessel was placed on mixer mill for 20 min with 20 min cooling cycle, twice (40 min total shaking). Dissolved in CH<sub>2</sub>Cl<sub>2</sub> and crude <sup>1</sup>H NMR (300 MHz, CDCl<sub>3</sub>) taken. No conversion was observed.

**Table S1.** Depolymerization of terpolymers and polymer mixtures containing varying ratios of PCHC and PPC.<sup>a</sup>

| Entry                | CHO: PO | % conv.<br>PCHC <sup>b</sup> | % conv.<br>PPC <sup>b</sup> |
|----------------------|---------|------------------------------|-----------------------------|
| <b>1</b>             | 4:1     | 98                           | >99                         |
| <b>2</b>             | 1:2     | >99                          | >99                         |
| <b>3<sup>c</sup></b> | 4:1     | 70                           | 70                          |
| <b>4<sup>c</sup></b> | 1:1     | 62                           | 59                          |
| <b>5<sup>d</sup></b> | 25:1    | 64                           | n.d.                        |

<sup>a</sup>All depolymerizations performed at 5 mol% BCF catalyst with respect to the repeat unit molar mass of PCHC. Performed in 20 mL toluene, at 105 °C for 2 h, under nitrogen. <sup>b</sup>Total % conversion to cyclic carbonate observed via <sup>1</sup>H NMR spectroscopy after 2 h. <sup>1</sup>H NMR spectra were collected in CDCl<sub>3</sub> at 298 K. <sup>c</sup>Depolymerizations performed using mixtures of polycarbonates (PPC and PCHC) rather than block copolymers derived from PO, CHO, and CO<sub>2</sub>. <sup>d</sup>% conversion of PPC to PC could not be determined by <sup>1</sup>H NMR spectroscopy due to masking of peaks by PCHC/CHC peaks.

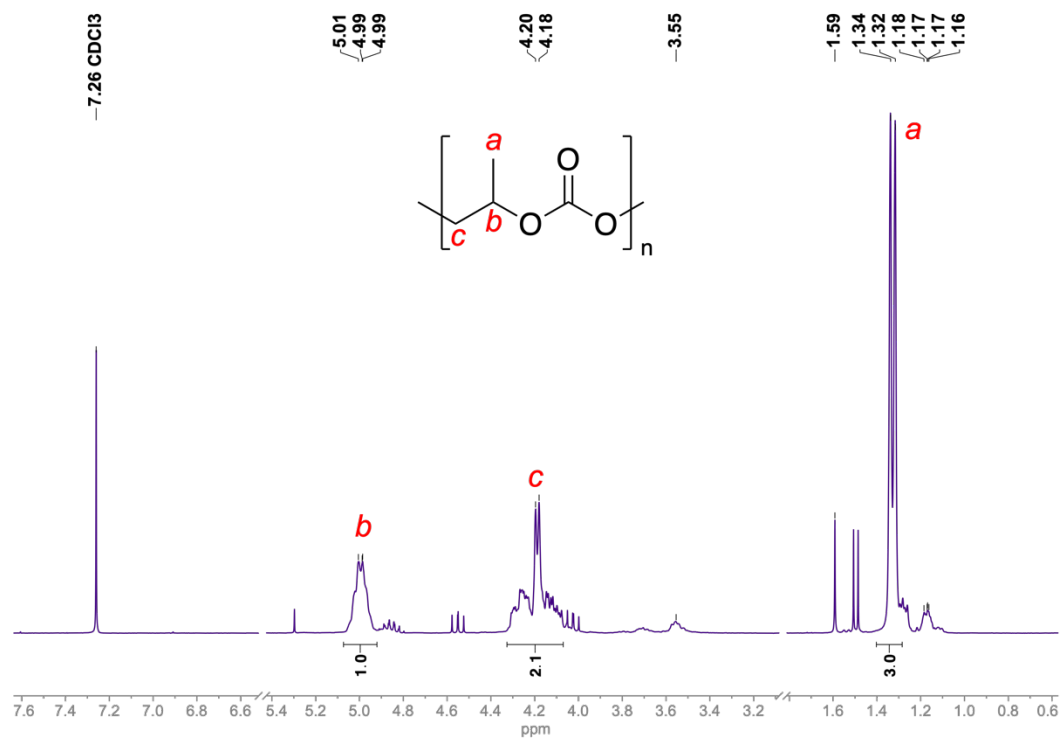

**Figure S1.** <sup>1</sup>H NMR spectrum (300 MHz, CDCl<sub>3</sub>) of poly(propylene carbonate) (PPC).

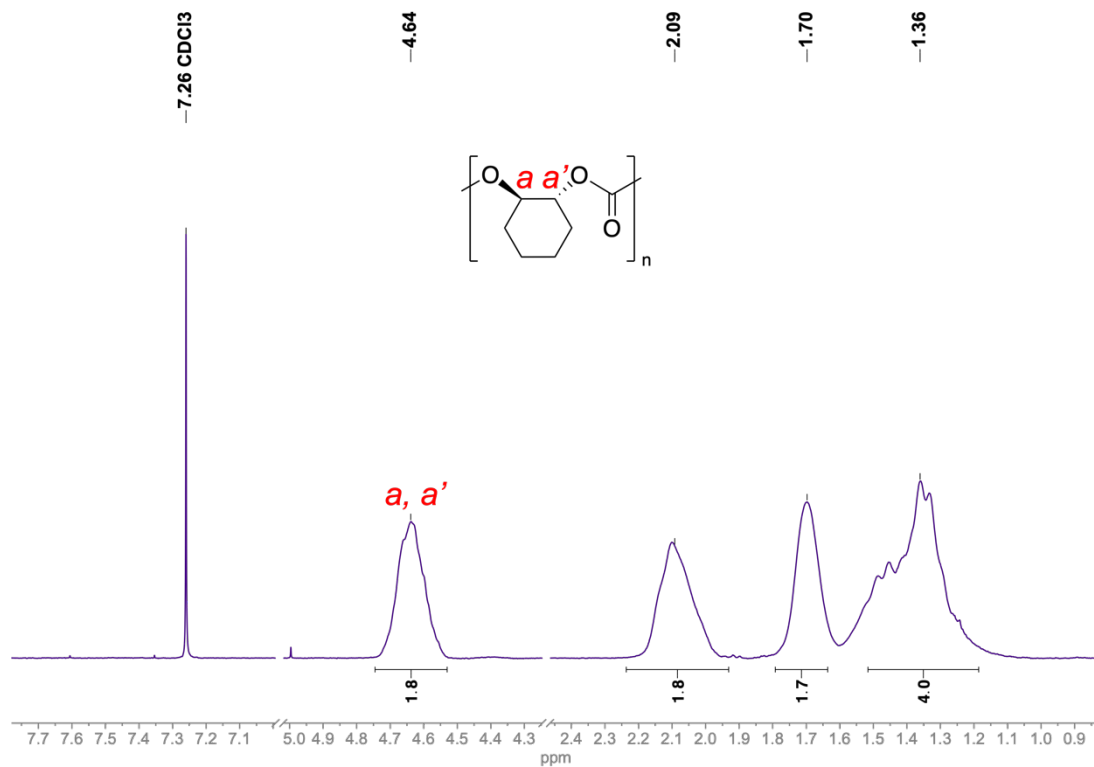

**Figure S2.** <sup>1</sup>H NMR spectrum (300 MHz, CDCl<sub>3</sub>) of poly(cyclohexene carbonate) (PCHC).

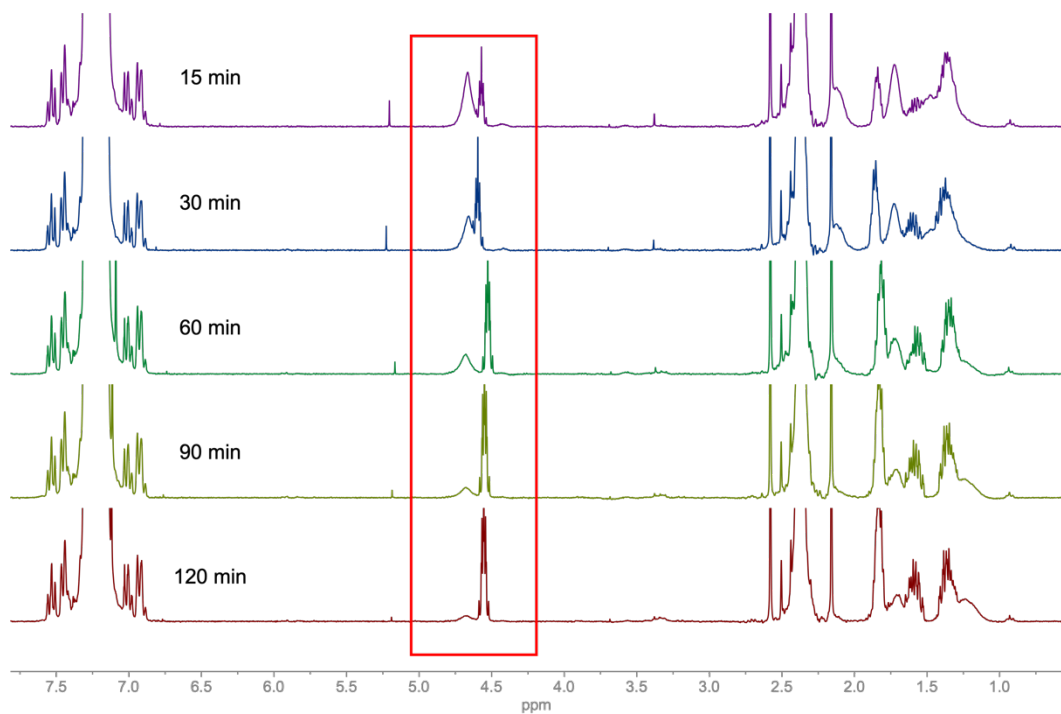

**Figure S3.** Stacked <sup>1</sup>H NMR spectra (300 MHz, CDCl<sub>3</sub>) of PCHC depolymerization progression (10 mol% BCF at 105 °C for 2 h). 15 min (top, purple), 30 min (second, blue), 60 min (third, green), 90 min (fourth, green/yellow), 120 min (bottom, red).

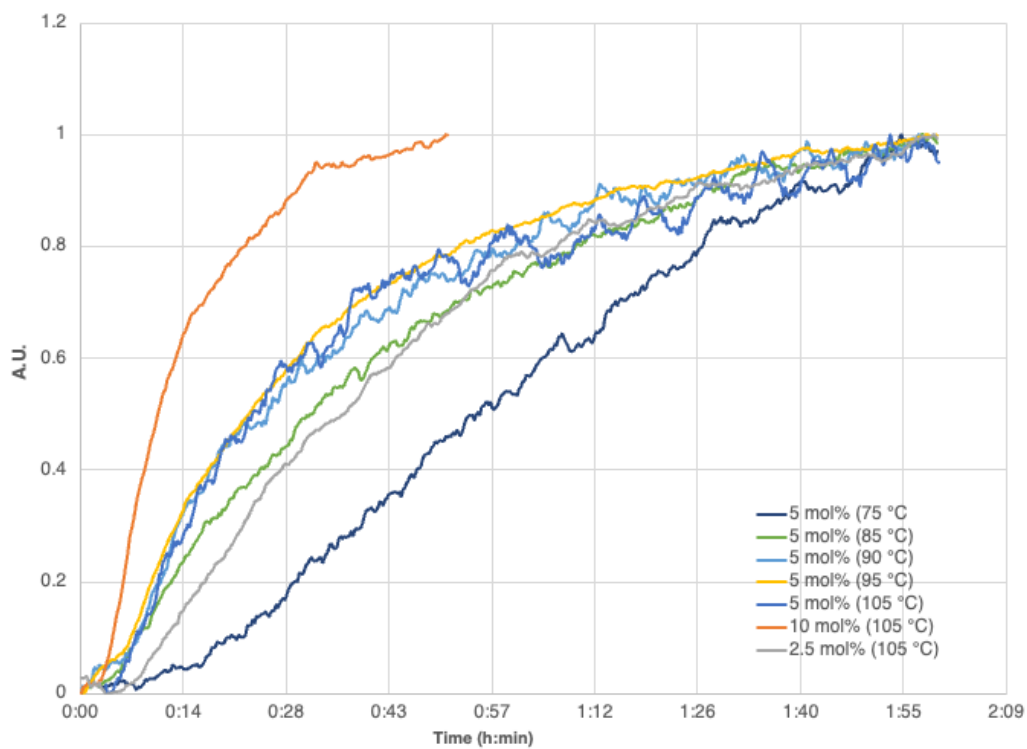

**Figure S4.** Overlay of normalized two-dimensional *in situ* FTIR spectra from CDP kinetic studies of PPC

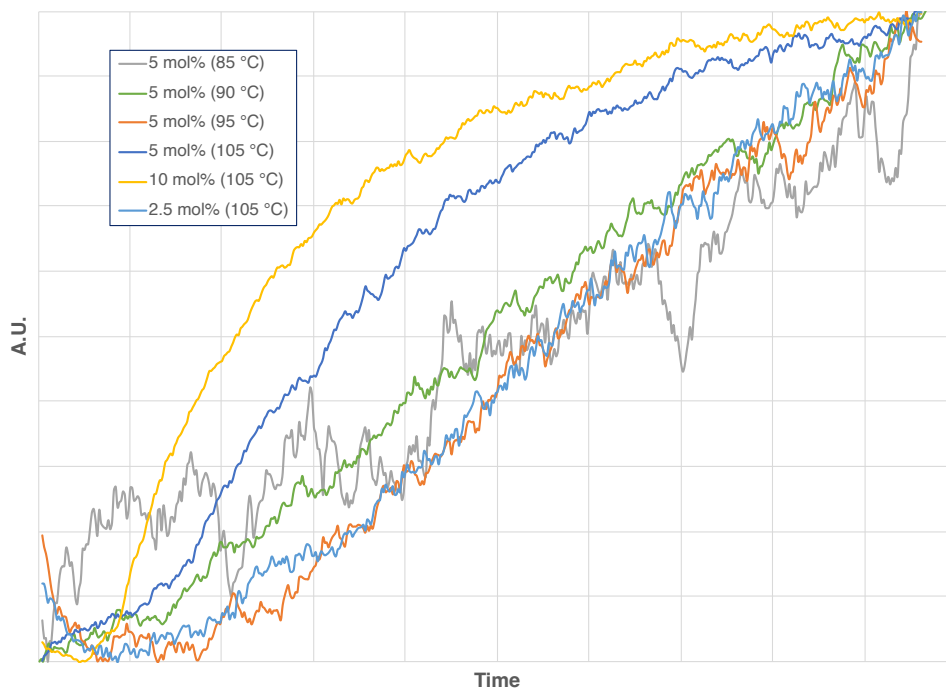

**Figure S5.** Overlay of normalized two-dimensional *in situ* FTIR spectra from CDP kinetic studies of PCHC

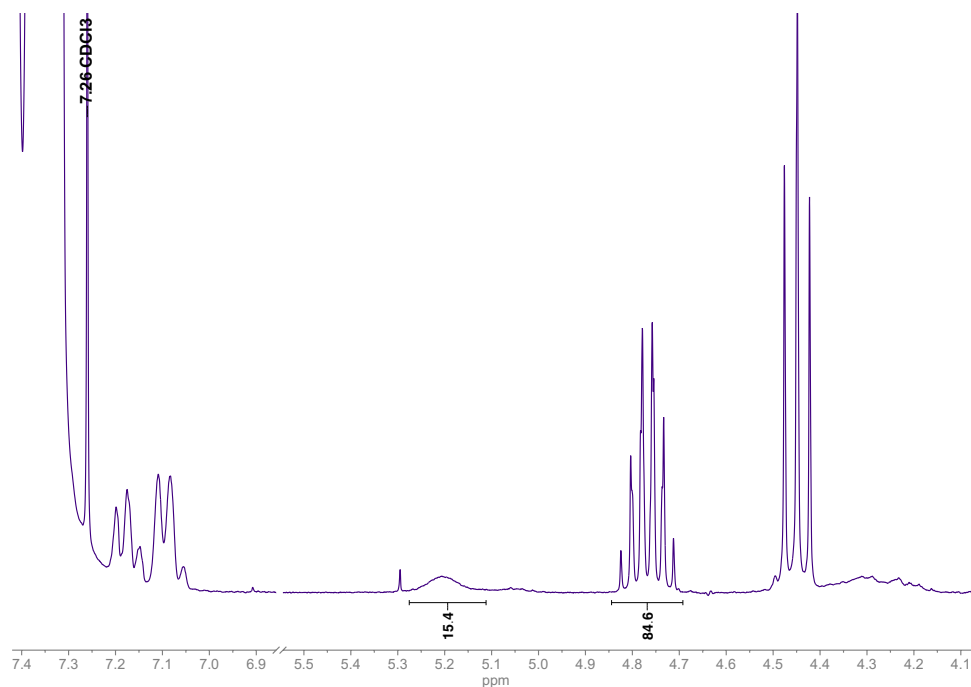

**Figure S6.** <sup>1</sup>H NMR spectrum (300 MHz, CDCl<sub>3</sub>) of PPC depolymerization with propylene carbonate impurity present. (1:1 PPC:PC, 2 h, 105 °C, 5 mol% BCF). % Conversion to PC = 70% [Initial conditions 50% PPC and 50% PC, Final conditions, 15% PPC and 85% PC. % Conversion = (50-15)/0.5 = 70%]

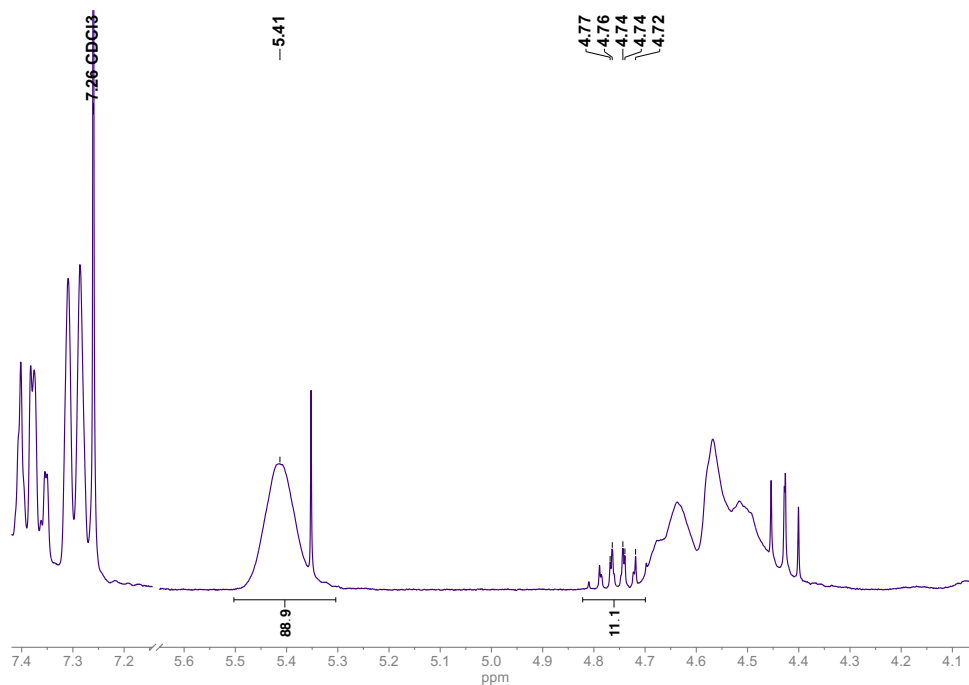

**Figure S7.** <sup>1</sup>H NMR spectrum (300 MHz, CDCl<sub>3</sub>) of PPC after BCF was exposed to air (2 h, 105 °C, 5 mol% BCF). % Conversion of PPC to PC = 11% [Initial conditions 100% PPC and 0% PC, Final conditions, 89% PPC and 11% PC. % Conversion = (100-89)/1 = 11%]

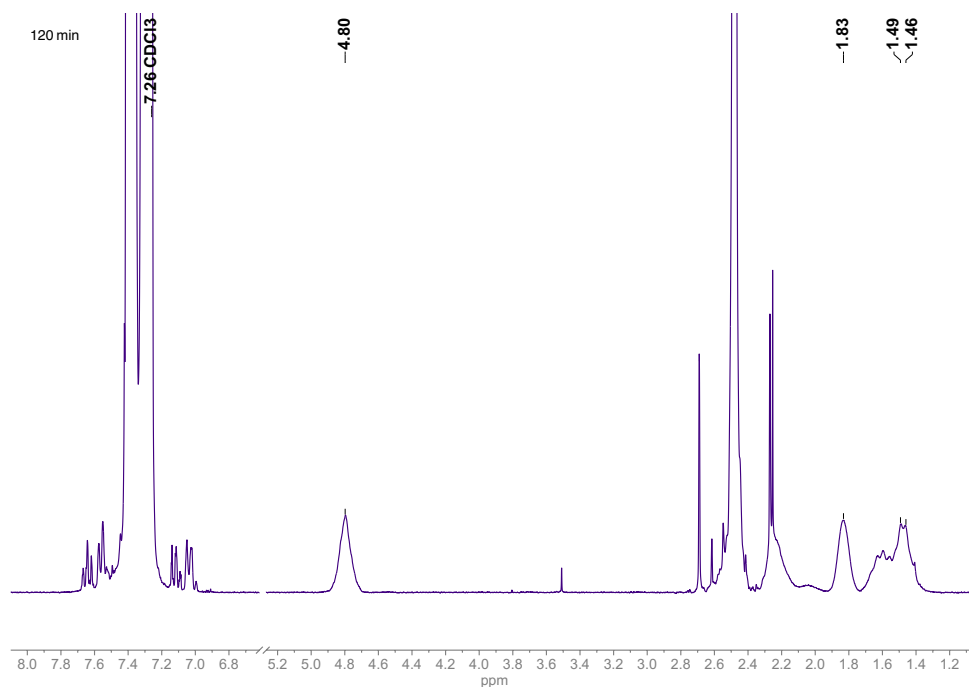

**Figure S8.** <sup>1</sup>H NMR spectrum (300 MHz, CDCl<sub>3</sub>) of PCHC depolymerization with 1 mol% H<sub>2</sub>O impurity present. (2 h, 105 °C, 5 mol% BCF). % Conversion of PCHC to CHC = <1% [Initial conditions 100% PCHC, Final conditions, 100% PCHC, no CHC detected]

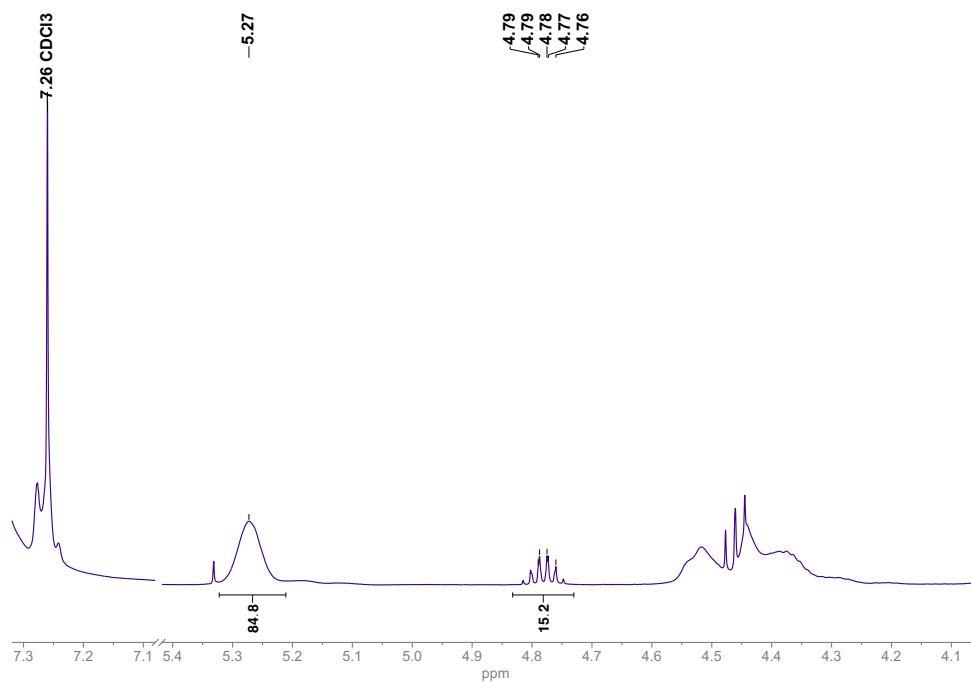

**Figure S9.** <sup>1</sup>H NMR spectrum (300 MHz, CDCl<sub>3</sub>) of PPC depolymerization with CO<sub>2</sub> impurity present. (2 h, 105 °C, 5 mol% BCF, 40 bar CO<sub>2</sub>). % Conversion of PPC to PC = 15% [Initial conditions 100% PPC and 0% PC, Final conditions, 85% PPC and 15% PC. % Conversion = (100-85)/1 = 15%]



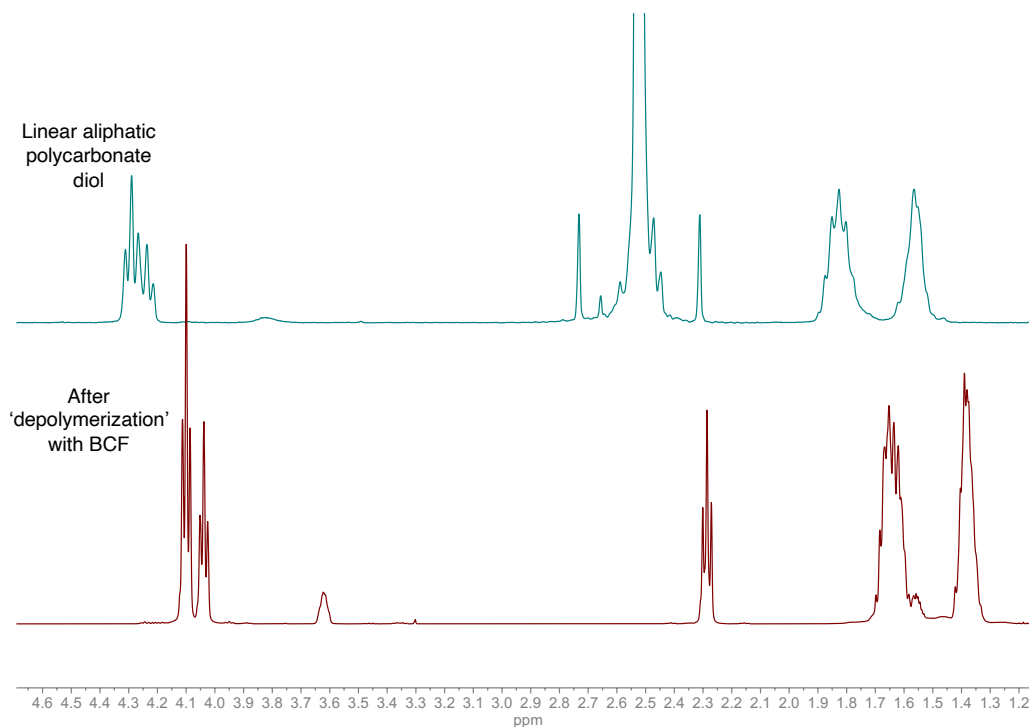

**Figure S10.** Stacked  $^1\text{H}$  NMR spectra (300 MHz,  $\text{CDCl}_3$ ) of starting commercial polycarbonate diol Desmorphen C1200 (top, blue) and after 18 h depolymerization with BCF (5 mol%, 105  $^\circ\text{C}$ ) in toluene.

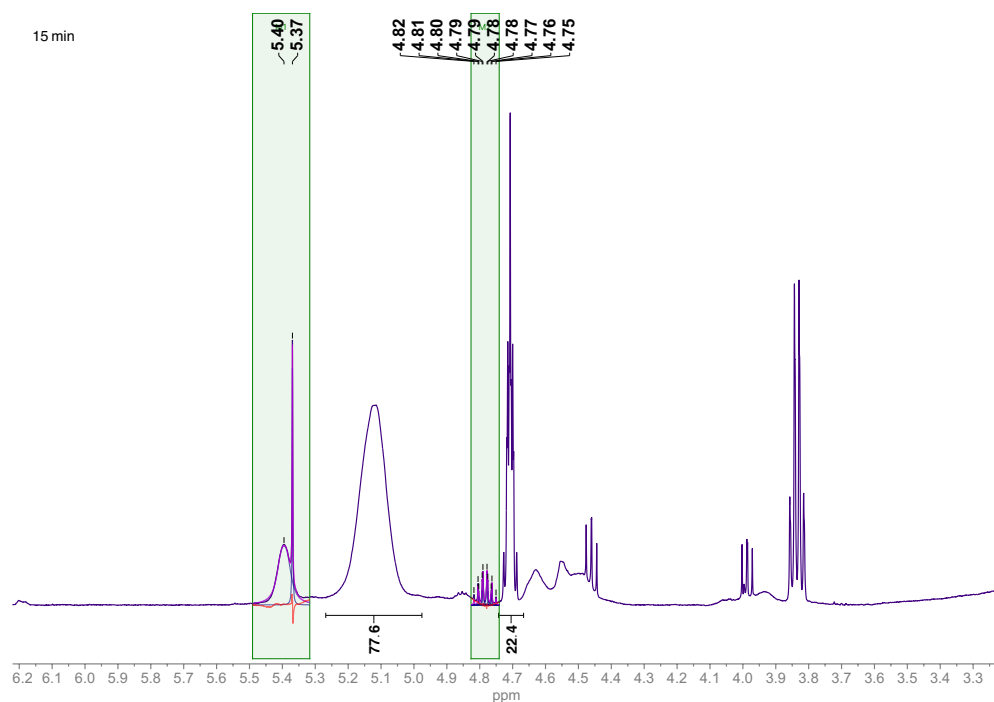

**Figure S11.**  $^1\text{H}$  NMR spectrum (500 MHz,  $\text{CDCl}_3$ ) of PCHC and PPC mixture (4:1 PCHC: PPC, 5 mol% BCF, 105  $^\circ\text{C}$ ) after 15 min. Line fitting was used to calculate % conversions. % conversion of PCHC to CHC = 22% (Table 3, entry 3)

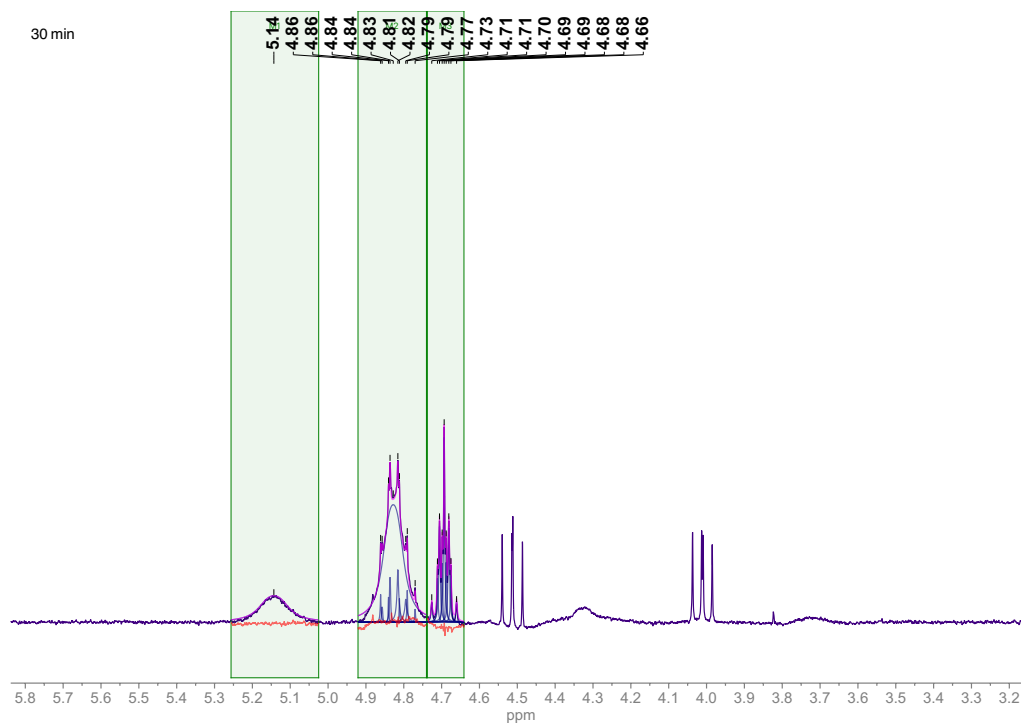

**Figure S12.**  $^1\text{H}$  NMR spectrum (500 MHz,  $\text{CDCl}_3$ ) of terpolymer depolymerization (4:1 PCHC:PPC, 105  $^\circ\text{C}$ , 5 mol% BCF) after 30 min. Line fitting was used to calculated % conversions (Table 3, entry 1)

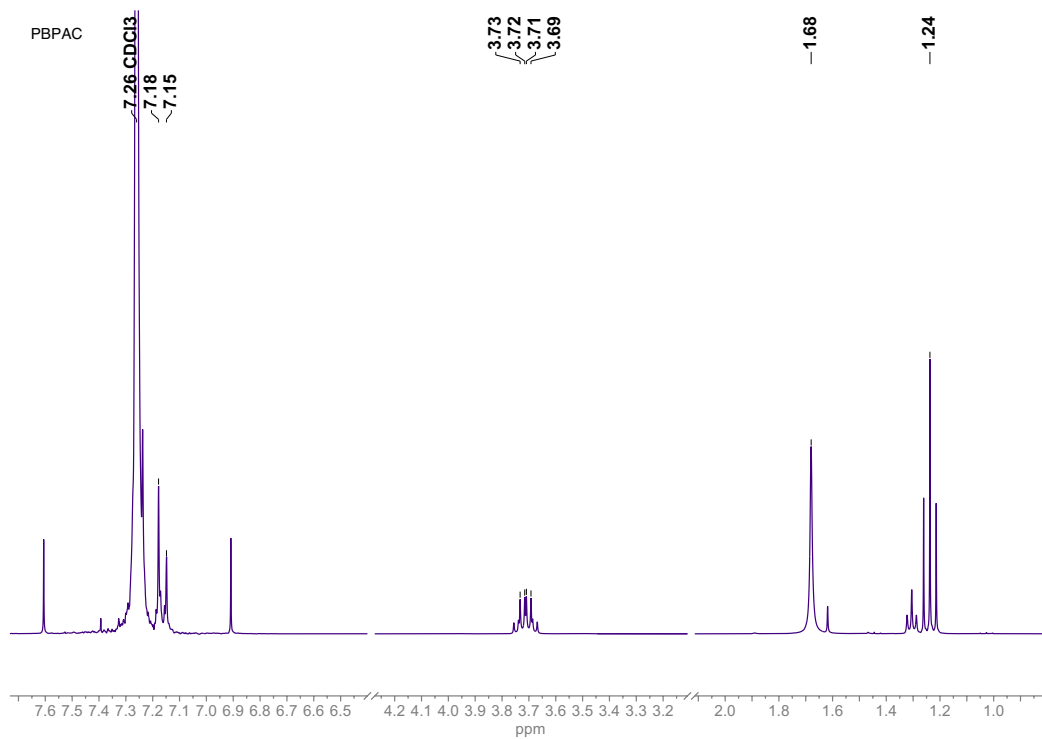

**Figure S13.**  $^1\text{H}$  NMR spectrum (500 MHz,  $\text{CDCl}_3$ ) of poly(bisphenol A carbonate) (PBPAC)

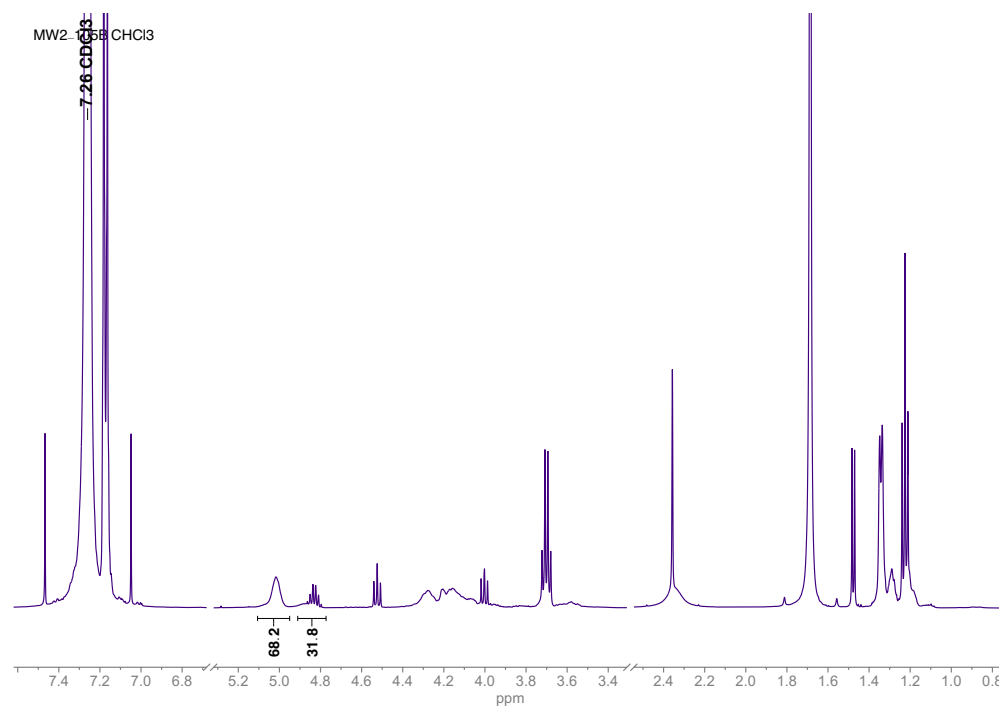

**Figure S14.**  $^1\text{H}$  NMR spectrum (500 MHz,  $\text{CDCl}_3$ ) of PBPAC and PPC mixture after 2 h depolymerization (5 mol% BCF to PPC, 105 °C)
